# Supplementary material for: FIN56, a novel ferroptosis inducer, triggers lysosomal membrane permeabilization in a TFEB-dependent manner in glioblastoma
Source: PubMed Central journal article supplement (PMC8517990; doi:10.7150/jca.58500), 2021-09-13

**Supplementary Figure 1. When cathepsin B and cathepsin D were inhibited by their inhibitor, CA-074 Me, pepstatin A, FIN56 didn't induce LMP in LN229 and U118 cells. Size bars = 10  $\mu$ m.**

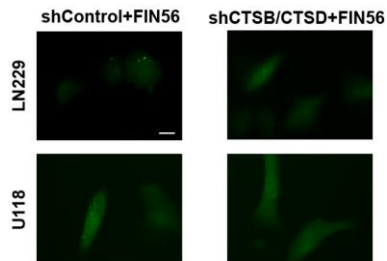

Supplement: jcav12p6610s1.pdf [file jcav12p6610s1.pdf]
